# Supplementary material for: Water-Soluble Tomato Extract Fruitflow Alters the Phosphoproteomic Profile of Collagen-Stimulated Platelets
Source: Front Pharmacol. 2021 Sep 27;12:746107. doi: 10.3389/fphar.2021.746107 (PMC8502824; doi:10.3389/fphar.2021.746107)
Supplement: Supplementary file 1 [file Table2.xlsx]

## Sheet: Sheet1
Supplement 3. Table 2. Different phosphoproteomics profiles compared FF-treated collagen-stimulated platelets with collagen-stimulated platelets alone
Protein	Protein Name	Gene Name	Function	Position	Amino acid	FF/CONTROL	t test p value
Q9Y613	FH1/FH2 domain-containing protein 1	FHOD1	FUNCTION: Required for the assembly of F-actin structures, such as stress fibers. Depends on the Rho-ROCK cascade for its activity. Contributes to the coordination of microtubules with actin fibers and plays a role in cell elongation. Acts synergistically with ROCK1 to promote SRC-dependent non-apoptotic plasma membrane blebbing. {ECO:0000269|PubMed:14576350, ECO:0000269|PubMed:15878344, ECO:0000…	1052	S	9.84776	0.000268406
Q14247	Src substrate cortactin	CTTN	FUNCTION: Contributes to the organization of the actin cytoskeleton and cell shape (PubMed:21296879). Plays a role in the formation of lamellipodia and in cell migration. Plays a role in the regulation of neuron morphology, axon growth and formation of neuronal growth cones (By similarity). Through its interaction with CTTNBP2, involved in the regulation of neuronal spine density (By similarity).…	150	S	8.74938	0.0010158
P16150	Leukosialin	SPN	FUNCTION: Predominant cell surface sialoprotein of leukocytes which regulates multiple T-cell functions, including T-cell activation, proliferation, differentiation, trafficking and migration. Positively regulates T-cell trafficking to lymph-nodes via its association with ERM proteins (EZR, RDX and MSN) (By similarity). Negatively regulates Th2 cell differentiation and predisposes the differentia…	291	S	8.60417	0.00523231
Q04759	Protein kinase C theta type	PRKCQ	FUNCTION: Calcium-independent, phospholipid- and diacylglycerol (DAG)-dependent serine/threonine-protein kinase that mediates non-redundant functions in T-cell receptor (TCR) signaling, including T-cells activation, proliferation, differentiation and survival, by mediating activation of multiple transcription factors such as NF-kappa-B, JUN, NFATC1 and NFATC2. In TCR-CD3/CD28-co-stimulated T-cell…	323	S	7.21026	4.3392e-05
P50552	Vasodilator-stimulated phosphoprotein	VASP	FUNCTION: Ena/VASP proteins are actin-associated proteins involved in a range of processes dependent on cytoskeleton remodeling and cell polarity such as axon guidance, lamellipodial and filopodial dynamics, platelet activation and cell migration. VASP promotes actin filament elongation. It protects the barbed end of growing actin filaments against capping and increases the rate of actin polymeri…	305	S	6.51865	0.00103957
Q9NS28	Regulator of G-protein signaling 18	RGS18	FUNCTION: Inhibits signal transduction by increasing the GTPase activity of G protein alpha subunits thereby driving them into their inactive GDP-bound form. Binds to G(i) alpha-1, G(i) alpha-2, G(i) alpha-3 and G(q) alpha. {ECO:0000269|PubMed:11042171, ECO:0000269|PubMed:11955952}.	28	S	6.36921	0.00540902
O60229	Kalirin	KALRN	FUNCTION: Promotes the exchange of GDP by GTP. Activates specific Rho GTPase family members, thereby inducing various signaling mechanisms that regulate neuronal shape, growth, and plasticity, through their effects on the actin cytoskeleton. Induces lamellipodia independent of its GEF activity. {ECO:0000269|PubMed:10023074}.	2396	S	5.71957	0.00378474
Q13442	28 kDa heat- and acid-stable phosphoprotein	PDAP1	FUNCTION: Enhances PDGFA-stimulated cell growth in fibroblasts, but inhibits the mitogenic effect of PDGFB. {ECO:0000250}.	178	S	5.21934	0.00516711
P61018	Ras-related protein Rab-4B	RAB4B	FUNCTION: Protein transport. Probably involved in vesicular traffic (By similarity). {ECO:0000250}.	193	S	5.2007	0.0066731
P37840	Alpha-synuclein	SNCA	FUNCTION: Neuronal protein that plays several roles in synaptic activity such as regulation of synaptic vesicle trafficking and subsequent neurotransmitter release. Participates as a monomer in synaptic vesicle exocytosis by enhancing vesicle priming, fusion and dilation of exocytotic fusion pores (PubMed:28288128, PubMed:30404828). Mechanistically, acts by increasing local Ca(2+) release from mi…	42	S	4.83654	0.0189208
Q13496	Myotubularin	MTM1	FUNCTION: Lipid phosphatase which dephosphorylates phosphatidylinositol 3-monophosphate (PI3P) and phosphatidylinositol 3,5-bisphosphate (PI(3,5)P2) (PubMed:11001925, PubMed:10900271, PubMed:12646134, PubMed:14722070). Has also been shown to dephosphorylate phosphotyrosine- and phosphoserine-containing peptides (PubMed:9537414). Negatively regulates EGFR degradation through regulation of EGFR tra…	18	S	4.7273	0.000614304
Q8IZP0	Abl interactor 1	ABI1	FUNCTION: May act in negative regulation of cell growth and transformation by interacting with nonreceptor tyrosine kinases ABL1 and/or ABL2. May play a role in regulation of EGF-induced Erk pathway activation. Involved in cytoskeletal reorganization and EGFR signaling. Together with EPS8 participates in transduction of signals from Ras to Rac. In vitro, a trimeric complex of ABI1, EPS8 and SOS1 …	222	S	4.71185	0.0111302
Q9Y2I8	WD repeat-containing protein 37	WDR37		119	S	4.64887	0.0039346
Q13442	28 kDa heat- and acid-stable phosphoprotein	PDAP1	FUNCTION: Enhances PDGFA-stimulated cell growth in fibroblasts, but inhibits the mitogenic effect of PDGFB. {ECO:0000250}.	176	S	4.23823	0.00200752
P49810	Presenilin-2	PSEN2	FUNCTION: Probable catalytic subunit of the gamma-secretase complex, an endoprotease complex that catalyzes the intramembrane cleavage of integral membrane proteins such as Notch receptors and APP (amyloid-beta precursor protein). Requires the other members of the gamma-secretase complex to have a protease activity. May play a role in intracellular signaling and gene expression or in linking chro…	25	S	4.19779	0.030124
Q14141	Septin-6	SEPTIN6	FUNCTION: Filament-forming cytoskeletal GTPase. Required for normal organization of the actin cytoskeleton. Involved in cytokinesis. May play a role in HCV RNA replication. Forms a filamentous structure with SEPTIN12, SEPTIN6, SEPTIN2 and probably SEPTIN4 at the sperm annulus which is required for the structural integrity and motility of the sperm tail during postmeiotic differentiation (PubMed:2…	416	S	4.15186	0.00238642
Q16181	Septin-7	SEPTIN7	FUNCTION: Filament-forming cytoskeletal GTPase. Required for normal organization of the actin cytoskeleton. Required for normal progress through mitosis. Involved in cytokinesis. Required for normal association of CENPE with the kinetochore. Plays a role in ciliogenesis and collective cell movements. Forms a filamentous structure with SEPTIN12, SEPTIN6, SEPTIN2 and probably SEPTIN4 at the sperm a…	423	S	4.08098	0.000145605
O15551	Claudin-3	CLDN3	FUNCTION: Plays a major role in tight junction-specific obliteration of the intercellular space, through calcium-independent cell-adhesion activity. {ECO:0000250|UniProtKB:Q9Z0G9}.	209	S	4.03662	0.00247398
O75396	Vesicle-trafficking protein SEC22b	SEC22B	FUNCTION: SNARE involved in targeting and fusion of ER-derived transport vesicles with the Golgi complex as well as Golgi-derived retrograde transport vesicles with the ER. {ECO:0000269|PubMed:15272311}.	137	S	3.89332	0.00583824
O00139	Kinesin-like protein KIF2A	KIF2A	FUNCTION: Plus end-directed microtubule-dependent motor required for normal brain development. May regulate microtubule dynamics during axonal growth. Required for normal progression through mitosis. Required for normal congress of chromosomes at the metaphase plate. Required for normal spindle dynamics during mitosis. Promotes spindle turnover. Implicated in formation of bipolar mitotic spindles…	100	S	3.88695	0.0431253
Q92890	Ubiquitin recognition factor in ER-associated degradation protein 1	UFD1	FUNCTION: Essential component of the ubiquitin-dependent proteolytic pathway which degrades ubiquitin fusion proteins. The ternary complex containing UFD1, VCP and NPLOC4 binds ubiquitinated proteins and is necessary for the export of misfolded proteins from the ER to the cytoplasm, where they are degraded by the proteasome. The NPLOC4-UFD1-VCP complex regulates spindle disassembly at the end of …	299	S	3.87785	9.00041e-07
Q8N9U0	Tandem C2 domains nuclear protein	TC2N		83	S	3.84733	0.0481353
Q9UJU6	Drebrin-like protein	DBNL	FUNCTION: Adapter protein that binds F-actin and DNM1, and thereby plays a role in receptor-mediated endocytosis. Plays a role in the reorganization of the actin cytoskeleton, formation of cell projections, such as neurites, in neuron morphogenesis and synapse formation via its interaction with WASL and COBL. Does not bind G-actin and promote actin polymerization by itself. Required for the forma…	291	T	3.71723	0.00126705
Q8N556	Actin filament-associated protein 1	AFAP1	FUNCTION: Can cross-link actin filaments into both network and bundle structures (By similarity). May modulate changes in actin filament integrity and induce lamellipodia formation. May function as an adapter molecule that links other proteins, such as SRC and PKC to the actin cytoskeleton. Seems to play a role in the development and progression of prostate adenocarcinoma by regulating cell-matri…	668	S	3.65857	0.00391859
Q15836	Vesicle-associated membrane protein 3	VAMP3	FUNCTION: SNARE involved in vesicular transport from the late endosomes to the trans-Golgi network. {ECO:0000269|PubMed:18195106}.	11	S	3.54981	0.000885535
O14672	Disintegrin and metalloproteinase domain-containing protein 10	ADAM10	FUNCTION: Cleaves the membrane-bound precursor of TNF-alpha at '76-Ala-|-Val-77' to its mature soluble form. Responsible for the proteolytical release of soluble JAM3 from endothelial cells surface (PubMed:20592283). Responsible for the proteolytic release of several other cell-surface proteins, including heparin-binding epidermal growth-like factor, ephrin-A2, CD44, CDH2 and for constitutive and…	740	S	3.47048	0.000281676
Q14247	Src substrate cortactin	CTTN	FUNCTION: Contributes to the organization of the actin cytoskeleton and cell shape (PubMed:21296879). Plays a role in the formation of lamellipodia and in cell migration. Plays a role in the regulation of neuron morphology, axon growth and formation of neuronal growth cones (By similarity). Through its interaction with CTTNBP2, involved in the regulation of neuronal spine density (By similarity).…	117	S	3.25553	0.00135958
Q9P270	SLAIN motif-containing protein 2	SLAIN2	FUNCTION: Binds to the plus end of microtubules and regulates microtubule dynamics and microtubule organization. Promotes cytoplasmic microtubule nucleation and elongation. Required for normal structure of the microtubule cytoskeleton during interphase. {ECO:0000269|PubMed:21646404}.	391	S	3.18615	0.0217281
Q16799	Reticulon-1	RTN1	FUNCTION: May be involved in neuroendocrine secretion or in membrane trafficking in neuroendocrine cells.	352	S	3.10113	0.00727285
P16157	Ankyrin-1	ANK1	FUNCTION: Attaches integral membrane proteins to cytoskeletal elements; binds to the erythrocyte membrane protein band 4.2, to Na-K ATPase, to the lymphocyte membrane protein GP85, and to the cytoskeletal proteins fodrin, tubulin, vimentin and desmin. Erythrocyte ankyrins also link spectrin (beta chain) to the cytoplasmic domain of the erythrocytes anion exchange protein; they retain most or all …	856	S	3.09428	0.00100346
Q9UBP0	Spastin	SPAST	FUNCTION: ATP-dependent microtubule severing protein that specifically recognizes and cuts microtubules that are polyglutamylated (PubMed:11809724, PubMed:15716377, PubMed:16219033, PubMed:17389232, PubMed:20530212, PubMed:22637577, PubMed:26875866). Preferentially recognizes and acts on microtubules decorated with short polyglutamate tails: severing activity increases as the number of glutamates…	268	S	3.09146	0.0372337
P37802	Transgelin-2	TAGLN2		185	S	3.02178	0.0125775
O75116	Rho-associated protein kinase 2	ROCK2	FUNCTION: Protein kinase which is a key regulator of actin cytoskeleton and cell polarity. Involved in regulation of smooth muscle contraction, actin cytoskeleton organization, stress fiber and focal adhesion formation, neurite retraction, cell adhesion and motility via phosphorylation of ADD1, BRCA2, CNN1, EZR, DPYSL2, EP300, MSN, MYL9/MLC2, NPM1, RDX, PPP1R12A and VIM. Phosphorylates SORL1 and …	1374	S	3.00008	0.0244538
P50552	Vasodilator-stimulated phosphoprotein	VASP	FUNCTION: Ena/VASP proteins are actin-associated proteins involved in a range of processes dependent on cytoskeleton remodeling and cell polarity such as axon guidance, lamellipodial and filopodial dynamics, platelet activation and cell migration. VASP promotes actin filament elongation. It protects the barbed end of growing actin filaments against capping and increases the rate of actin polymeri…	314	S	2.94354	8.82362e-05
Q0ZGT2	Nexilin	NEXN	FUNCTION: Involved in regulating cell migration through association with the actin cytoskeleton. Has an essential role in the maintenance of Z line and sarcomere integrity. {ECO:0000269|PubMed:12053183, ECO:0000269|PubMed:15823560, ECO:0000269|PubMed:19881492}.	218	S	2.93038	0.000122635
O60229	Kalirin	KALRN	FUNCTION: Promotes the exchange of GDP by GTP. Activates specific Rho GTPase family members, thereby inducing various signaling mechanisms that regulate neuronal shape, growth, and plasticity, through their effects on the actin cytoskeleton. Induces lamellipodia independent of its GEF activity. {ECO:0000269|PubMed:10023074}.	1780	S	2.71694	0.0168955
Q14012	Calcium/calmodulin-dependent protein kinase type 1	CAMK1	FUNCTION: Calcium/calmodulin-dependent protein kinase that operates in the calcium-triggered CaMKK-CaMK1 signaling cascade and, upon calcium influx, regulates transcription activators activity, cell cycle, hormone production, cell differentiation, actin filament organization and neurite outgrowth. Recognizes the substrate consensus sequence [MVLIF]-x-R-x(2)-[ST]-x(3)-[MVLIF]. Regulates axonal ext…	363	S	2.62852	0.00931891
P46019	Phosphorylase b kinase regulatory subunit alpha, liver isoform	PHKA2	FUNCTION: Phosphorylase b kinase catalyzes the phosphorylation of serine in certain substrates, including troponin I. The alpha chain may bind calmodulin.	729	S	2.62083	0.018907
P21333	Filamin-A	FLNA	FUNCTION: Promotes orthogonal branching of actin filaments and links actin filaments to membrane glycoproteins. Anchors various transmembrane proteins to the actin cytoskeleton and serves as a scaffold for a wide range of cytoplasmic signaling proteins. Interaction with FLNB may allow neuroblast migration from the ventricular zone into the cortical plate. Tethers cell surface-localized furin, mod…	2339	S	2.61122	0.0197093
Q13586	Stromal interaction molecule 1	STIM1	FUNCTION: Plays a role in mediating store-operated Ca(2+) entry (SOCE), a Ca(2+) influx following depletion of intracellular Ca(2+) stores (PubMed:15866891, PubMed:16005298, PubMed:16208375, PubMed:16537481, PubMed:16733527, PubMed:16766533, PubMed:16807233, PubMed:18854159, PubMed:19249086, PubMed:22464749, PubMed:24069340, PubMed:24351972, PubMed:24591628, PubMed:26322679, PubMed:25326555, PubM…	512	S	2.5738	0.00283396
Q13464	Rho-associated protein kinase 1	ROCK1	FUNCTION: Protein kinase which is a key regulator of actin cytoskeleton and cell polarity (PubMed:10436159, PubMed:10652353, PubMed:11018042, PubMed:11283607, PubMed:17158456, PubMed:18573880, PubMed:19131646, PubMed:8617235, PubMed:9722579). Involved in regulation of smooth muscle contraction, actin cytoskeleton organization, stress fiber and focal adhesion formation, neurite retraction, cell ad…	1341	S	2.5368	0.00702952
P61073	C-X-C chemokine receptor type 4	CXCR4	FUNCTION: Receptor for the C-X-C chemokine CXCL12/SDF-1 that transduces a signal by increasing intracellular calcium ion levels and enhancing MAPK1/MAPK3 activation (PubMed:10452968, PubMed:28978524, PubMed:18799424, PubMed:24912431). Involved in the AKT signaling cascade (PubMed:24912431). Plays a role in regulation of cell migration, e.g. during wound healing (PubMed:28978524). Acts as a recept…	319	S	2.51222	0.00122064
Q05682	Caldesmon	CALD1	FUNCTION: Actin- and myosin-binding protein implicated in the regulation of actomyosin interactions in smooth muscle and nonmuscle cells (could act as a bridge between myosin and actin filaments). Stimulates actin binding of tropomyosin which increases the stabilization of actin filament structure. In muscle tissues, inhibits the actomyosin ATPase by binding to F-actin. This inhibition is attenua…	783	S	2.41968	0.0079637
O15117	FYN-binding protein 1	FYB1	FUNCTION: Acts as an adapter protein of the FYN and LCP2 signaling cascades in T-cells (By similarity). May play a role in linking T-cell signaling to remodeling of the actin cytoskeleton (PubMed:10747096, PubMed:16980616). Modulates the expression of IL2 (By similarity). Involved in platelet activation (By similarity). Prevents the degradation of SKAP1 and SKAP2 (PubMed:15849195). May be involve…	329	S	2.41472	0.0395847
Q86YS7	C2 domain-containing protein 5	C2CD5	FUNCTION: Required for insulin-stimulated glucose transport and glucose transporter SLC2A4/GLUT4 translocation from intracellular glucose storage vesicle (GSV) to the plasma membrane (PM) in adipocytes. Binds phospholipid membranes in a calcium-dependent manner and is necessary for the optimal membrane fusion between SLC2A4/GLUT4 GSV and the PM. {ECO:0000269|PubMed:21907143}.	305	S	2.39043	0.0272973
Q05682	Caldesmon	CALD1	FUNCTION: Actin- and myosin-binding protein implicated in the regulation of actomyosin interactions in smooth muscle and nonmuscle cells (could act as a bridge between myosin and actin filaments). Stimulates actin binding of tropomyosin which increases the stabilization of actin filament structure. In muscle tissues, inhibits the actomyosin ATPase by binding to F-actin. This inhibition is attenua…	643	S	2.31732	0.0453673
O75563	Src kinase-associated phosphoprotein 2	SKAP2	FUNCTION: May be involved in B-cell and macrophage adhesion processes. In B-cells, may act by coupling the B-cell receptor (BCR) to integrin activation. May play a role in src signaling pathway. {ECO:0000269|PubMed:12893833, ECO:0000269|PubMed:9837776}.	286	S	2.30437	0.039048
O43516	WAS/WASL-interacting protein family member 1	WIPF1	FUNCTION: Plays a role in the reorganization of the actin cytoskeleton. Contributes with NCK1 and GRB2 in the recruitment and activation of WASL. May participate in regulating the subcellular localization of WASL, resulting in the disassembly of stress fibers in favor of filopodia formation. Plays a role in the formation of cell ruffles (By similarity). Plays an important role in the intracellula…	234	S	2.29583	0.0315344
Q9UHY1	Nuclear receptor-binding protein	NRBP1	FUNCTION: May play a role in subcellular trafficking between the endoplasmic reticulum and Golgi apparatus through interactions with the Rho-type GTPases. Binding to the NS3 protein of dengue virus type 2 appears to subvert this activity into the alteration of the intracellular membrane structure associated with flaviviral replication. {ECO:0000269|PubMed:11956649, ECO:0000269|PubMed:15084397, EC…	433	T	2.25419	0.000736996
Q12913	Receptor-type tyrosine-protein phosphatase eta	PTPRJ	FUNCTION: Tyrosine phosphatase which dephosphorylates or contributes to the dephosphorylation of CTNND1, FLT3, PDGFRB, MET, RET (variant MEN2A), KDR, LYN, SRC, MAPK1, MAPK3, EGFR, TJP1, OCLN, PIK3R1 and PIK3R2. Plays a role in cell adhesion, migration, proliferation and differentiation. Involved in vascular development. Regulator of macrophage adhesion and spreading. Positively affects cell-matri…	1011	S	2.21298	0.00139016
Q96RI0	Proteinase-activated receptor 4	F2RL3	FUNCTION: Receptor for activated thrombin or trypsin coupled to G proteins that stimulate phosphoinositide hydrolysis. May play a role in platelets activation. {ECO:0000269|PubMed:10079109}.	382	S	2.19942	0.00252096
Q684P5	Rap1 GTPase-activating protein 2	RAP1GAP2	FUNCTION: GTPase activator for the nuclear Ras-related regulatory protein RAP-1A (KREV-1), converting it to the putatively inactive GDP-bound state. {ECO:0000269|PubMed:15632203}.	574	S	2.1931	0.00380361
Q05209	Tyrosine-protein phosphatase non-receptor type 12	PTPN12	FUNCTION: Dephosphorylates a range of proteins, and thereby regulates cellular signaling cascades (PubMed:18559503). Dephosphorylates cellular tyrosine kinases, such as ERBB2 and PTK2B/PYK2, and thereby regulates signaling via ERBB2 and PTK2B/PYK2 (PubMed:17329398, PubMed:27134172). Selectively dephosphorylates ERBB2 phosphorylated at 'Tyr-1112', 'Tyr-1196', and/or 'Tyr-1248' (PubMed:27134172). {…	449	S	2.18212	0.0141175
Q7LDG7	RAS guanyl-releasing protein 2	RASGRP2	FUNCTION: Functions as a calcium- and DAG-regulated nucleotide exchange factor specifically activating Rap through the exchange of bound GDP for GTP. May also activates other GTPases such as RRAS, RRAS2, NRAS, KRAS but not HRAS. Functions in aggregation of platelets and adhesion of T-lymphocytes and neutrophils probably through inside-out integrin activation. May function in the muscarinic acetyl…	134	T	2.17013	0.00944702
P98172	Ephrin-B1	EFNB1	FUNCTION: Cell surface transmembrane ligand for Eph receptors, a family of receptor tyrosine kinases which are crucial for migration, repulsion and adhesion during neuronal, vascular and epithelial development (PubMed:8070404, PubMed:7973638). Binding to Eph receptors residing on adjacent cells leads to contact-dependent bidirectional signaling into neighboring cells (PubMed:8070404, PubMed:79736…	281	S	2.15298	0.0356509
P49841	Glycogen synthase kinase-3 beta	GSK3B	FUNCTION: Constitutively active protein kinase that acts as a negative regulator in the hormonal control of glucose homeostasis, Wnt signaling and regulation of transcription factors and microtubules, by phosphorylating and inactivating glycogen synthase (GYS1 or GYS2), EIF2B, CTNNB1/beta-catenin, APC, AXIN1, DPYSL2/CRMP2, JUN, NFATC1/NFATC, MAPT/TAU and MACF1. Requires primed phosphorylation of …	390	T	2.1299	0.023863
Q9Y490	Talin-1	TLN1	FUNCTION: Probably involved in connections of major cytoskeletal structures to the plasma membrane. High molecular weight cytoskeletal protein concentrated at regions of cell-substratum contact and, in lymphocytes, at cell-cell contacts (By similarity). {ECO:0000250}.	2051	S	2.11928	0.0340263
O75563	Src kinase-associated phosphoprotein 2	SKAP2	FUNCTION: May be involved in B-cell and macrophage adhesion processes. In B-cells, may act by coupling the B-cell receptor (BCR) to integrin activation. May play a role in src signaling pathway. {ECO:0000269|PubMed:12893833, ECO:0000269|PubMed:9837776}.	283	S	2.11875	0.030489
A6NFX1	Major facilitator superfamily domain-containing protein 2B	MFSD2B	FUNCTION: Cation-dependent lipid transporter that specifically mediates export of sphingosine-1-phosphate in red blood cells and platelets (PubMed:29045386). Sphingosine-1-phosphate is a signaling sphingolipid and its export from red blood cells into in the plasma is required for red blood cell morphology (By similarity). Does not transport lysophosphatidylcholine (LPC) (By similarity). {ECO:0000…	26	S	2.09233	0.0298524
P16150	Leukosialin	SPN	FUNCTION: Predominant cell surface sialoprotein of leukocytes which regulates multiple T-cell functions, including T-cell activation, proliferation, differentiation, trafficking and migration. Positively regulates T-cell trafficking to lymph-nodes via its association with ERM proteins (EZR, RDX and MSN) (By similarity). Negatively regulates Th2 cell differentiation and predisposes the differentia…	355	S	2.08326	0.000208802
Q07960	Rho GTPase-activating protein 1	ARHGAP1	FUNCTION: GTPase activator for the Rho, Rac and Cdc42 proteins, converting them to the putatively inactive GDP-bound state. Cdc42 seems to be the preferred substrate.	51	S	2.06604	0.0100167
Q9UBH6	Xenotropic and polytropic retrovirus receptor 1	XPR1	FUNCTION: Plays a role in phosphate homeostasis. Mediates phosphate export from the cell (PubMed:23791524, PubMed:25938945). Binds inositol hexakisphosphate (Ins6P) and similar inositol polyphosphates, such as 5-diphospho-inositol pentakisphosphate (5-InsP7); these are important intracellular signaling molecules (PubMed:27080106). {ECO:0000250|UniProtKB:Q9Z0U0, ECO:0000269|PubMed:23791524, ECO:00…	668	S	2.05539	0.0115153
Q9BZL6	Serine/threonine-protein kinase D2	PRKD2	FUNCTION: Serine/threonine-protein kinase that converts transient diacylglycerol (DAG) signals into prolonged physiological effects downstream of PKC, and is involved in the regulation of cell proliferation via MAPK1/3 (ERK1/2) signaling, oxidative stress-induced NF-kappa-B activation, inhibition of HDAC7 transcriptional repression, signaling downstream of T-cell antigen receptor (TCR) and cytoki…	214	S	2.0435	0.0157589
Q5T5C0	Syntaxin-binding protein 5	STXBP5	FUNCTION: Plays a regulatory role in calcium-dependent exocytosis and neurotransmitter release. Inhibits membrane fusion between transport vesicles and the plasma membrane. May modulate the assembly of trans-SNARE complexes between transport vesicles and the plasma membrane. Inhibits translocation of GLUT4 from intracellular vesicles to the plasma membrane. Competes with STXBP1 for STX1 binding (…	692	S	2.04081	0.0372008
P35611	Alpha-adducin	ADD1	FUNCTION: Membrane-cytoskeleton-associated protein that promotes the assembly of the spectrin-actin network. Binds to calmodulin.	726	S	2.01468	0.00478085
O15511	Actin-related protein 2/3 complex subunit 5	ARPC5	FUNCTION: Component of the Arp2/3 complex, a multiprotein complex that mediates actin polymerization upon stimulation by nucleation-promoting factor (NPF) (PubMed:9230079). The Arp2/3 complex mediates the formation of branched actin networks in the cytoplasm, providing the force for cell motility (PubMed:9230079). In addition to its role in the cytoplasmic cytoskeleton, the Arp2/3 complex also pr…	2	S	2.00069	0.0237257
Q9BYI3	Hyccin	FAM126A	FUNCTION: Component of a complex required to localize phosphatidylinositol 4-kinase (PI4K) to the plasma membrane (PubMed:26571211). The complex acts as a regulator of phosphatidylinositol 4-phosphate (PtdIns(4)P) synthesis (PubMed:26571211). FAM126A plays a key role in oligodendrocytes formation, a cell type with expanded plasma membrane that requires generation of PtdIns(4)P (PubMed:26571211). …	415	S	0.49968	0.00973373
Q9UBW5	Bridging integrator 2	BIN2	FUNCTION: Promotes cell motility and migration, probably via its interaction with the cell membrane and with podosome proteins that mediate interaction with the cytoskeleton. Modulates membrane curvature and mediates membrane tubulation. Plays a role in podosome formation. Inhibits phagocytosis. {ECO:0000269|PubMed:23285027}.	451	S	0.497682	0.00194567
Q5VZK9	F-actin-uncapping protein LRRC16A	CARMIL1	FUNCTION: Cell membrane-cytoskeleton-associated protein that plays a role in the regulation of actin polymerization at the barbed end of actin filaments. Prevents F-actin heterodimeric capping protein (CP) activity at the leading edges of migrating cells, and hence generates uncapped barbed ends and enhances actin polymerization, however, seems unable to nucleate filaments (PubMed:16054028). Play…	1331	S	0.492242	0.0412196
Q14155	Rho guanine nucleotide exchange factor 7	ARHGEF7	FUNCTION: Acts as a RAC1 guanine nucleotide exchange factor (GEF) and can induce membrane ruffling. Functions in cell migration, attachment and cell spreading. Promotes targeting of RAC1 to focal adhesions (By similarity). May function as a positive regulator of apoptosis. Downstream of NMDA receptors and CaMKK-CaMK1 signaling cascade, promotes the formation of spines and synapses in hippocampal …	649	S	0.491743	0.00657642
P02686	Myelin basic protein	MBP	FUNCTION: The classic group of MBP isoforms (isoform 4-isoform 14) are with PLP the most abundant protein components of the myelin membrane in the CNS. They have a role in both its formation and stabilization. The smaller isoforms might have an important role in remyelination of denuded axons in multiple sclerosis. The non-classic group of MBP isoforms (isoform 1-isoform 3/Golli-MBPs) may prefere…	96	S	0.487659	0.000646956
Q7Z7N9	Transmembrane protein 179B	TMEM179B		206	S	0.482995	0.0220466
Q9NQ75	Cas scaffolding protein family member 4	CASS4	FUNCTION: Docking protein that plays a role in tyrosine kinase-based signaling related to cell adhesion and cell spreading. Regulates PTK2/FAK1 activity, focal adhesion integrity, and cell spreading. {ECO:0000269|PubMed:18256281}.	249	S	0.480648	0.0169996
Q14155	Rho guanine nucleotide exchange factor 7	ARHGEF7	FUNCTION: Acts as a RAC1 guanine nucleotide exchange factor (GEF) and can induce membrane ruffling. Functions in cell migration, attachment and cell spreading. Promotes targeting of RAC1 to focal adhesions (By similarity). May function as a positive regulator of apoptosis. Downstream of NMDA receptors and CaMKK-CaMK1 signaling cascade, promotes the formation of spines and synapses in hippocampal …	650	T	0.470917	0.00209087
Q96B97	SH3 domain-containing kinase-binding protein 1	SH3KBP1	FUNCTION: Adapter protein involved in regulating diverse signal transduction pathways. Involved in the regulation of endocytosis and lysosomal degradation of ligand-induced receptor tyrosine kinases, including EGFR and MET/hepatocyte growth factor receptor, through an association with CBL and endophilins. The association with CBL, and thus the receptor internalization, may be inhibited by an inte…	230	S	0.462613	0.000359259
Q8NEN9	PDZ domain-containing protein 8	PDZD8	FUNCTION: Molecular tethering protein that connects endoplasmic reticulum and mitochondria membranes (PubMed:29097544). PDZD8-dependent endoplasmic reticulum-mitochondria membrane tethering is essential for endoplasmic reticulum-mitochondria Ca(2+) transfer (PubMed:29097544). In neurons, involved in the regulation of dendritic Ca(2+) dynamics by regulating mitochondrial Ca(2+) uptake in neurons (…	521	S	0.459527	0.0400851
P34947	G protein-coupled receptor kinase 5	GRK5	FUNCTION: Serine/threonine kinase that phosphorylates preferentially the activated forms of a variety of G-protein-coupled receptors (GPCRs). Such receptor phosphorylation initiates beta-arrestin-mediated receptor desensitization, internalization, and signaling events leading to their down-regulation. Phosphorylates a variety of GPCRs, including adrenergic receptors, muscarinic acetylcholine rece…	484	S	0.459435	0.000811212
Q4G0F5	Vacuolar protein sorting-associated protein 26B	VPS26B	FUNCTION: Acts as component of the retromer cargo-selective complex (CSC). The CSC is believed to be the core functional component of retromer or respective retromer complex variants acting to prevent missorting of selected transmembrane cargo proteins into the lysosomal degradation pathway. The recruitment of the CSC to the endosomal membrane involves RAB7A and SNX3. The SNX-BAR retromer mediate…	304	S	0.44667	0.0119885
Q8N699	Myc target protein 1	MYCT1	FUNCTION: May regulate certain MYC target genes, MYC seems to be a direct upstream transcriptional activator. Does not seem to significantly affect growth cell capacity. Overexpression seems to mediate many of the known phenotypic features associated with MYC, including promotion of apoptosis, alteration of morphology, enhancement of anchorage-independent growth, tumorigenic conversion, promotion…	155	S	0.437394	0.00715495
Q9Y5K6	CD2-associated protein	CD2AP	FUNCTION: Seems to act as an adapter protein between membrane proteins and the actin cytoskeleton (PubMed:10339567). In collaboration with CBLC, modulates the rate of RET turnover and may act as regulatory checkpoint that limits the potency of GDNF on neuronal survival. Controls CBLC function, converting it from an inhibitor to a promoter of RET degradation (By similarity). May play a role in rec…	458	S	0.426336	0.000514374
P18206	Vinculin	VCL	FUNCTION: Actin filament (F-actin)-binding protein involved in cell-matrix adhesion and cell-cell adhesion. Regulates cell-surface E-cadherin expression and potentiates mechanosensing by the E-cadherin complex. May also play important roles in cell morphology and locomotion. {ECO:0000269|PubMed:20484056}.	434	S	0.419929	0.0236052
Q9Y6F6	Protein MRVI1	MRVI1	FUNCTION: Plays a role as NO/PRKG1-dependent regulator of IP3-induced calcium release; its phosphorylation by PRKG1 inhibits bradykinin and IP3-induced calcium release from intracellular stores. Recruits PRKG1 to the endoplasmic reticulum and may mediate the assembly of PRKG1 and ITPR1 in a macrocomplex. Involved in PRKG1 signaling cascade leading to inhibition of platelet activation and aggregat…	312	S	0.414875	0.0447884
P21731	Thromboxane A2 receptor	TBXA2R	FUNCTION: Receptor for thromboxane A2 (TXA2), a potent stimulator of platelet aggregation. The activity of this receptor is mediated by a G-protein that activates a phosphatidylinositol-calcium second messenger system. In the kidney, the binding of TXA2 to glomerular TP receptors causes intense vasoconstriction. Activates phospholipase C. Isoform 1 activates adenylyl cyclase. Isoform 2 inhibits a…	329	S	0.413045	0.000144913
Q96QR8	Transcriptional activator protein Pur-beta	PURB	FUNCTION: Has capacity to bind repeated elements in single-stranded DNA such as the purine-rich single strand of the PUR element located upstream of the MYC gene. Plays a role in the control of vascular smooth muscle (VSM) alpha-actin gene transcription as repressor in myoblasts and fibroblasts. Participates in transcriptional and translational regulation of alpha-MHC expression in cardiac myocyt…	6	S	0.412747	0.0189063
Q9Y3Q8	TSC22 domain family protein 4	TSC22D4	FUNCTION: Transcriptional repressor.	165	S	0.410617	0.00874433
P04792	Heat shock protein beta-1	HSPB1	FUNCTION: Small heat shock protein which functions as a molecular chaperone probably maintaining denatured proteins in a folding-competent state (PubMed:10383393, PubMed:20178975). Plays a role in stress resistance and actin organization (PubMed:19166925). Through its molecular chaperone activity may regulate numerous biological processes including the phosphorylation and the axonal transport of …	15	S	0.410066	0.000510783
Q9Y490	Talin-1	TLN1	FUNCTION: Probably involved in connections of major cytoskeletal structures to the plasma membrane. High molecular weight cytoskeletal protein concentrated at regions of cell-substratum contact and, in lymphocytes, at cell-cell contacts (By similarity). {ECO:0000250}.	425	S	0.406114	0.00449571
Q08495	Dematin	DMTN	FUNCTION: Membrane-cytoskeleton-associated protein with F-actin-binding activity that induces F-actin bundles formation and stabilization. Its F-actin-bundling activity is reversibly regulated upon its phosphorylation by the cAMP-dependent protein kinase A (PKA). Binds to the erythrocyte membrane glucose transporter-1 SLC2A1/GLUT1, and hence stabilizes and attaches the spectrin-actin network to t…	105	S	0.36505	0.0200062
O43182	Rho GTPase-activating protein 6	ARHGAP6	FUNCTION: GTPase activator for the Rho-type GTPases by converting them to an inactive GDP-bound state. Could regulate the interactions of signaling molecules with the actin cytoskeleton. Promotes continuous elongation of cytoplasmic processes during cell motility and simultaneous retraction of the cell body changing the cell morphology. {ECO:0000269|PubMed:10699171}.	264	S	0.358149	0.00933691
O94804	Serine/threonine-protein kinase 10	STK10	FUNCTION: Serine/threonine-protein kinase involved in regulation of lymphocyte migration. Phosphorylates MSN, and possibly PLK1. Involved in regulation of lymphocyte migration by mediating phosphorylation of ERM proteins such as MSN. Acts as a negative regulator of MAP3K1/MEKK1. May also act as a cell cycle regulator by acting as a polo kinase kinase: mediates phosphorylation of PLK1 in vitro; ho…	417	S	0.352385	0.00262771
Q96C24	Synaptotagmin-like protein 4	SYTL4	FUNCTION: Modulates exocytosis of dense-core granules and secretion of hormones in the pancreas and the pituitary. Interacts with vesicles containing negatively charged phospholipids in a Ca(2+)-independent manner (By similarity). {ECO:0000250}.	289	S	0.340468	0.0141574
Q9UBW5	Bridging integrator 2	BIN2	FUNCTION: Promotes cell motility and migration, probably via its interaction with the cell membrane and with podosome proteins that mediate interaction with the cytoskeleton. Modulates membrane curvature and mediates membrane tubulation. Plays a role in podosome formation. Inhibits phagocytosis. {ECO:0000269|PubMed:23285027}.	425	S	0.339916	0.0256169
Q9UBW5	Bridging integrator 2	BIN2	FUNCTION: Promotes cell motility and migration, probably via its interaction with the cell membrane and with podosome proteins that mediate interaction with the cytoskeleton. Modulates membrane curvature and mediates membrane tubulation. Plays a role in podosome formation. Inhibits phagocytosis. {ECO:0000269|PubMed:23285027}.	430	S	0.335219	0.0293542
Q8N699	Myc target protein 1	MYCT1	FUNCTION: May regulate certain MYC target genes, MYC seems to be a direct upstream transcriptional activator. Does not seem to significantly affect growth cell capacity. Overexpression seems to mediate many of the known phenotypic features associated with MYC, including promotion of apoptosis, alteration of morphology, enhancement of anchorage-independent growth, tumorigenic conversion, promotion…	107	S	0.333703	0.00532177
Q9UNZ2	NSFL1 cofactor p47	NSFL1C	FUNCTION: Reduces the ATPase activity of VCP (By similarity). Necessary for the fragmentation of Golgi stacks during mitosis and for VCP-mediated reassembly of Golgi stacks after mitosis (By similarity). May play a role in VCP-mediated formation of transitional endoplasmic reticulum (tER) (By similarity). Inhibits the activity of CTSL (in vitro) (PubMed:15498563). Together with UBXN2B/p37, regula…	114	S	0.332262	0.0236267
O75962	Triple functional domain protein	TRIO	FUNCTION: Guanine nucleotide exchange factor (GEF) for RHOA and RAC1 GTPases (PubMed:8643598, PubMed:22155786, PubMed:27418539). Involved in coordinating actin remodeling, which is necessary for cell migration and growth (PubMed:10341202, PubMed:22155786). In developing hippocampal neurons, limits dendrite formation, without affecting the establishment of axon polarity. Once dendrites are formed,…	2455	S	0.323022	0.0145434
O43488	Aflatoxin B1 aldehyde reductase member 2	AKR7A2	FUNCTION: Catalyzes the NADPH-dependent reduction of succinic semialdehyde to gamma-hydroxybutyrate. May have an important role in producing the neuromodulator gamma-hydroxybutyrate (GHB). Has broad substrate specificity. Has NADPH-dependent aldehyde reductase activity towards 2-carboxybenzaldehyde, 2-nitrobenzaldehyde and pyridine-2-aldehyde (in vitro). Can reduce 1,2-naphthoquinone and 9,10-phe…	255	S	0.31974	0.0203638
Q15642	Cdc42-interacting protein 4	TRIP10	FUNCTION: Required for translocation of GLUT4 to the plasma membrane in response to insulin signaling (By similarity). Required to coordinate membrane tubulation with reorganization of the actin cytoskeleton during endocytosis. Binds to lipids such as phosphatidylinositol 4,5-bisphosphate and phosphatidylserine and promotes membrane invagination and the formation of tubules. Also promotes CDC42-i…	299	S	0.319616	0.00215381
O94804	Serine/threonine-protein kinase 10	STK10	FUNCTION: Serine/threonine-protein kinase involved in regulation of lymphocyte migration. Phosphorylates MSN, and possibly PLK1. Involved in regulation of lymphocyte migration by mediating phosphorylation of ERM proteins such as MSN. Acts as a negative regulator of MAP3K1/MEKK1. May also act as a cell cycle regulator by acting as a polo kinase kinase: mediates phosphorylation of PLK1 in vitro; ho…	454	S	0.317151	0.0349912
Q9NS28	Regulator of G-protein signaling 18	RGS18	FUNCTION: Inhibits signal transduction by increasing the GTPase activity of G protein alpha subunits thereby driving them into their inactive GDP-bound form. Binds to G(i) alpha-1, G(i) alpha-2, G(i) alpha-3 and G(q) alpha. {ECO:0000269|PubMed:11042171, ECO:0000269|PubMed:11955952}.	49	S	0.307156	0.0439538
Q9UBW5	Bridging integrator 2	BIN2	FUNCTION: Promotes cell motility and migration, probably via its interaction with the cell membrane and with podosome proteins that mediate interaction with the cytoskeleton. Modulates membrane curvature and mediates membrane tubulation. Plays a role in podosome formation. Inhibits phagocytosis. {ECO:0000269|PubMed:23285027}.	395	S	0.294128	0.0427984
Q96C24	Synaptotagmin-like protein 4	SYTL4	FUNCTION: Modulates exocytosis of dense-core granules and secretion of hormones in the pancreas and the pituitary. Interacts with vesicles containing negatively charged phospholipids in a Ca(2+)-independent manner (By similarity). {ECO:0000250}.	274	S	0.255268	0.00559089
Q14644	Ras GTPase-activating protein 3	RASA3	FUNCTION: Inhibitory regulator of the Ras-cyclic AMP pathway. Binds inositol tetrakisphosphate (IP4) with high affinity. Might be a specific IP4 receptor.	830	S	0.212949	0.0377878
